# Supplementary material
Source: HighWire-hosted journal article supplement (https://bmjopen.bmj.com/content/10/5/e034428)

## Supplementary Material

**METHODS****Case definition and inclusion criteria**

Patients with potential IPF cases were identified via Read Codes (the clinical coding system within UK general practice) and free-text within clinical records for IPF diagnosis and/or IPF-related medication (Pirfenidone and Nintedanib). The Read Codes and free-text search terms for identifying IPF diagnosis and medication are listed below. This group of patients are subsequently referred to as the overall IPF patients group.

A subset of patients who had a code for a consultation to a chest specialist prior to IPF diagnosis (code for specialist consultation allowed until up to 60 days period after the diagnosis) was identified as the primary analysis population. This group of patients was defined to select for patients with a more confident diagnosis for IPF, as IPF diagnosis is difficult to make and non-IPF patients may be erroneously assigned with IPF diagnosis codes. Read Codes used to identify chest specialist consultation are listed below.

**Selection of signs, symptoms and clinical features**

At the initial stage of the study, a manual review was conducted for all Read Codes and free-text records from the first record date from a sample of 40 IPF patients consisting of:

- 1) A convenient sample of 25 registered patients from 2 GP practices with at least one IPF diagnosis code, and
- 2) All patients with Pirfenidone or Nintedanib prescription (n=15).

This was to identify IPF related signs and symptoms present within the patient records. Signs and symptoms potentially related to IPF were shortlisted by the research team including a UK general practitioner for data extraction as Read Codes or free text in the full study sample. The following signs and symptoms were selected: clubbed fingers, cough, crackles, dry cough, dyspnoea (shortness of breath), fatigue/malaise, loss of appetite, and weight loss.

A second round of manual review of all Read Codes related to other clinical features identified from the overall IPF patients group was also conducted by 2 general practitioners with a special interest in respiratory medicine involved with the study (RJ and DP). This was to select for clinical features relevant to IPF. The following clinical features were selected: chest examination, chest/respiratory infection, chest specialist consultation, chest symptoms, chest CT-scan conducted, chest X-ray conducted, COPD diagnosis, COPD exacerbation, fibrosis diagnosis, interstitial lung disease diagnosis, lung function test, smoking status, and sputum test.

#### **List of Read Codes and free-text string used to identify IPF:**

##### IPF diagnosis

###### **Specific codes**

|                |                                     |
|----------------|-------------------------------------|
| H563.          | Idiopathic fibrosing alveolitis     |
| H5630          | Alveolar capillary block            |
| XE0Yb          | Cryptogenic fibrosing alveolitis    |
| H563z          | Idiopathic fibrosing alveolitis NOS |
| H5633 or X102v | Usual interstitial pneumonitis      |

###### **Broad codes**

|       |                            |
|-------|----------------------------|
| H5631 | Diffuse pulmonary fibrosis |
| H5632 | Pulmonary fibrosis         |
| XE0Zr | Hamman-Rich syndrome       |

##### Search terms in free text

“ ipf “  
“ urtipf “

“ idiop” AND “ pulm” AND “ fib”

#### IPF Medication

|       |                            |
|-------|----------------------------|
| h8M.. | PIRFENIDONE                |
| h8M1. | ESBRIET 267mg capsules     |
| h8M2. | PIRFENIDONE 267mg capsules |
| hhq.. | NINTEDANIB                 |
| hhq1. | VARGATEF 100mg capsules    |
| hhq2. | VARGATEF 150mg capsules    |
| hhq3. | NINTEDANIB 100mg capsules  |
| hhq4. | NINTEDANIB 150mg capsules  |
| hhq5. | OFEV 100mg capsules        |
| hhq6. | OFEV 150mg capsules        |

Search terms in free text

“Pirfenidone”  
 “Esbriet”  
 “Nintedanib”  
 “vargatef”  
 “ofev”

#### **List of Read Codes and free-text string used to identify signs and symptoms:**

##### Clubbed fingers

Read code

|       |                               |
|-------|-------------------------------|
| 2G28. | O/E - hands - finger clubbing |
| R015. | [D]Clubbing of fingers        |
| X75vj | Clubbing of nail              |
| X75vl | Pseudo-clubbing               |
| XM0z5 | Clubbing of fingers/toes [D]  |
| Xa1zM | Finger clubbing               |

Search terms in free text

“club” AND (“finger” or “toe” or “digit” or “nail”)  
 “clubbing”

##### Cough

Read code

|       |                                |
|-------|--------------------------------|
| 171.. | C/O - cough                    |
| 1712. | Dry cough                      |
| 1713. | Productive cough -clear sputum |
| 1714. | Productive cough -green sputum |
| 1715. | Productive cough-yellow sputum |
| 1716. | Productive cough NOS           |
| 1717. | Night cough present            |
| 1718. | Night cough absent             |
| 1719. | Chesty cough                   |
| 171A. | Chronic cough                  |
| 171C. | Morning cough                  |
| 171D. | Evening cough                  |
| 171E. | Unexplained cough              |
| 171G. | Bovine cough                   |
| 171J. | Reflux cough                   |
| 171K. | Barking cough                  |
| 171L. | Cough on exercise              |
| 171Z. | Cough symptom NOS              |
| 173B. | Nocturnal cough / wheeze       |
| R062. | [D]Cough                       |
| R0621 | [D]Episodic dry cough          |
| X76Hy | Productive cough               |
| X76Hz | Nocturnal cough                |
| X76I0 | Cough when swallowing          |
| XE0qn | Cough                          |
| XE0qo | Productive cough NOS           |
| XM1QR | Spasmodic cough                |
| Xa2kc | Persistent cough               |
| Xa6a9 | Increasing frequency of cough  |
| Xa7mD | Allergic cough                 |
| Xa7u9 | Brassy cough                   |
| Xa7uA | Bovine cough                   |
| Xa7uB | Effective cough                |
| XaBmo | Cough on exercise              |
| XaFwR | Unexplained cough              |
| XaLCS | Reflux cough                   |
| XaYYO | Episodic dry cough             |

Search terms in free text

“cough“

### Crackles

Read code

X76II                      Moist crackles

|       |                             |
|-------|-----------------------------|
| X76Im | Bubbling crackles           |
| X76In | Post-tussive crackles       |
| XM02C | Coarse respiratory crackles |
| XM02D | Fine respiratory crackles   |
| XM08B | Respiratory crackles        |
| Xa7uv | Inspiratory crackles        |
| Xa7uw | Expiratory crackles         |

## Search terms in free text

“crackles”  
 “velcro”

Dry cough

## Read code

|       |                       |
|-------|-----------------------|
| 1712. | Dry cough             |
| R0621 | [D]Episodic dry cough |
| XaYYO | Episodic dry cough    |

## Search terms in free text

“cough” AND “dry”

Dyspnoea

## Read code

|       |                                     |
|-------|-------------------------------------|
| 173.. | Breathlessness                      |
| 1732. | Breathless - moderate exertion      |
| 1733. | Breathless - mild exertion          |
| 1734. | Breathless - at rest                |
| 1735. | Breathless - lying flat             |
| 1739. | Shortness of breath                 |
| 173C. | Short of breath on exertion         |
| 173F. | Short of breath dressing/undressing |
| 173I. | MRC Breathlessness Scale: grade 2   |
| 173J. | MRC Breathlessness Scale: grade 3   |
| 173K. | MRC Breathlessness Scale: grade 4   |
| 173L. | MRC Breathlessness Scale: grade 5   |
| X76Gz | Dyspnoea on exertion                |
| XE0qq | Dyspnoea                            |
| XE0qr | Orthopnoea                          |
| XaIQ2 | Short of breath dressing/undressing |

|       |                                   |
|-------|-----------------------------------|
| XaIUl | MRC Breathlessness Scale: grade 2 |
| XaIUm | MRC Breathlessness Scale: grade 3 |
| XaIUu | MRC Breathlessness Scale: grade 4 |
| XaIUo | MRC Breathlessness Scale: grade 5 |

#### Search terms in free text

“dyspnoea” OR “dyspnea” OR “breathless” OR “sob” OR “orthopnea” OR  
 “orthopnoea” OR “platypnea” OR “platypnoea”  
 “short” AND “breath”

#### Fatigue or malaise

##### Read code

|       |                                                              |
|-------|--------------------------------------------------------------|
| 168.. | Tiredness symptom                                            |
| 1682. | Fatigue                                                      |
| 1683. | Tired all the time                                           |
| 1684. | Malaise/lethargy                                             |
| 1688. | Exhaustion                                                   |
| 168Z. | Tiredness symptom NOS                                        |
| R007. | [D]Malaise and fatigue                                       |
| R0070 | [D]Malaise                                                   |
| R0071 | [D]Fatigue                                                   |
| R0072 | [D]Asthenia NOS                                              |
| R0073 | [D]Lethargy                                                  |
| R0075 | [D]Tiredness                                                 |
| R007z | [D]Malaise and fatigue NOS                                   |
| R202. | [D]Senile asthenia                                           |
| R203. | [D]Senile debility                                           |
| R204. | [D]Senile exhaustion                                         |
| R2y3. | [D]Debility, unspecified                                     |
| X70xR | Exhaustion - physiological                                   |
| X76Ae | Exhaustion                                                   |
| XE0qj | Tiredness symptom                                            |
| XE0qk | Tired all the time                                           |
| XE0ql | Malaise/lethargy                                             |
| XE0uN | [Tiredness], [fatigue], [lethargy] or [malaise] symptom      |
| XE0uP | (Malaise: [/lethargy] or [debility]) or (overwork) or (postv |
| XE1aa | (Nerv debil - neurasth) or (nerv exhaus) or (tired all time) |
| XE2y5 | [D]Debility, unspecified                                     |
| XM06l | Malaise and fatigue                                          |
| XM06o | Lethargy                                                     |
| XM09P | Senile asthenia                                              |
| XM09Q | Senile debility                                              |
| XM09R | Senile exhaustion                                            |
| XM0Ce | C/O - debility - malaise                                     |

|       |                          |
|-------|--------------------------|
| XM0D3 | Fatigue - symptom        |
| XM0D5 | C/O - tired all the time |
| XM0yx | Asthenia [D]             |
| XM1AV | Asthenia                 |
| Xa96S | Tiredness                |

#### Search terms in free text

“fatigue”  
 “malaise”  
 “tiredness”  
 “tired all the time”  
 “somnolence”  
 “lethargy”  
 “discomfort”  
 “muzzy head”  
 “debility”  
 “heavy legs”  
 “heavy feeling”  
 “tearful”

#### Loss of appetite

##### Read code

|       |                              |
|-------|------------------------------|
| 1612. | Appetite loss - anorexia     |
| 1615. | Reduced appetite             |
| E2756 | Non-organic loss of appetite |
| Eu50y | [X]Other eating disorders    |
| R0300 | [D]Appetite loss             |
| X76cJ | Loss of appetite - symptom   |
| XE24f | Appetite loss - anorexia     |
| XM07Y | Loss of appetite             |

#### Search terms in free text

(“loss” OR “reduc”) AND “appet”  
 “anorexia”  
 “appetite”

#### Weight loss

##### Read code

|       |                           |
|-------|---------------------------|
| 1623. | Weight decreasing         |
| 1625. | Abnormal weight loss      |
| 1627. | Unintentional weight loss |

|       |                            |
|-------|----------------------------|
| 1D1A. | Complaining of weight loss |
| R032. | [D]Abnormal loss of weight |
| XE0uH | Weight loss (& abnormal)   |
| XaQgK | Unexplained weight loss    |
| XaXTs | Unintentional weight loss  |

Search terms in free text

("weight" OR "wt") AND ("loss" OR "decreas" OR "abno" OR "unexp")

### List of Read Codes used to identify clinical features:

#### Chest specialist consultation (used for patient selection)

|       |                                      |
|-------|--------------------------------------|
| 9N2g. | Seen by respiratory physician        |
| 9Nk7. | Seen in respiratory clinic           |
| XaASI | Seen by respiratory physician        |
| 8H4C. | Referred to chest physician          |
| 8H4g. | Referral to respiratory physician    |
| XaONr | Seen in respiratory clinic           |
| XaAfm | Referral to respiratory physician    |
| 9N1b. | Seen in chest clinic                 |
| 744Bz | Rigid diagnostic bronchoscopy NOS    |
| 9N0u. | Seen in community respiratory clinic |
| 8HVR. | Private referral to chest physician  |
| XaAfk | Referral to chest physician          |

#### Chest examination

Read code

|       |                                |
|-------|--------------------------------|
| 23... | Examn. of respiratory system   |
| X774f | Respiratory rate               |
| 2315  | Resp. system examined - NAD    |
| XM1Ue | O/E - chest examination normal |
| 23G.. | Chest clear                    |
| XM0CK | O/E - chest findings           |
| Xa83j | Chest clear                    |

#### Chest/respiratory infection

Read code

|       |                              |
|-------|------------------------------|
| H06z0 | Chest infection NOS          |
| XE0Xs | Chest infection NOS          |
| H0... | Acute respiratory infections |



|       |                                         |
|-------|-----------------------------------------|
| H06z1 | Lower resp tract infection              |
| X1004 | Infection of lower respiratory tract    |
| 2E31. | O/E - temperature normal                |
| H062. | Acute lower respiratory tract infection |
| XM1QW | Respiratory tract infection             |
| XE0Xt | Acute lower respiratory tract infection |
| H30.. | Bronchitis unspecified                  |
| H0z.. | Acute respiratory infection NOS         |
| XM1QX | Acute wheezy bronchitis                 |
| H06z2 | Recurrent chest infection               |

### Chest symptoms

#### Read code

|       |                                            |
|-------|--------------------------------------------|
| 182.. | Chest pain                                 |
| 23D3. | O/E - coarse crepitations                  |
| 23D4. | O/E - fine crepitations                    |
| 1828  | Atypical chest pain                        |
| R065A | [D]Musculoskeletal chest pain              |
| 182Z. | Chest pain NOS                             |
| 1825  | Pleuritic pain                             |
| R065. | [D]Chest pain                              |
| R0658 | [D]Chest tightness                         |
| 23D.. | O/E - adventitious sounds                  |
| R065B | [D]Non cardiac chest pain                  |
| 182C. | Chest wall pain                            |
| 182A. | Chest pain on exertion                     |
| R065z | [D]Chest pain NOS                          |
| XSJF8 | Chest wall pain                            |
| 9N0f. | Seen in rapid access chest pain clinic     |
| 1824  | Anterior chest wall pain                   |
| 1822  | Central chest pain                         |
| 8HTJ. | Referral to rapid access chest pain clinic |
| Xa2kY | Basal crepitations                         |

### Chest CT-scan

#### Read code

|       |                                                       |
|-------|-------------------------------------------------------|
| 5678  | CAT scan - thorax                                     |
| 56780 | CT (computed tomography) of chest and abdomen         |
| 7P040 | Computed tomography of chest                          |
| 56781 | CT (computed tomography) of chest, abdomen and pelvis |

### Chest X-ray

#### Read code

|       |                                |
|-------|--------------------------------|
| 535.. | Standard chest X-ray           |
| 5353  | Standard chest X-ray abnormal  |
| 5352  | Standard chest X-ray normal    |
| 5351  | Standard chest X-ray requested |
| 7P042 | Plain x-ray of chest           |
| 535Z. | Standard chest X-ray NOS       |
| 68C1. | Screening chest X-ray          |

#### COPD diagnosis

##### Read code

|       |                                       |
|-------|---------------------------------------|
| H3... | Chronic obstructive pulmonary disease |
|-------|---------------------------------------|

#### COPD exacerbation

##### Read code

|       |                                                           |
|-------|-----------------------------------------------------------|
| H3122 | Acute exacerbation of chronic obstructive airways disease |
|-------|-----------------------------------------------------------|

#### Fibrosis diagnosis

##### Read code      Read term

|       |                                |
|-------|--------------------------------|
| 23E5. | O/E - fibrosis of lung present |
|-------|--------------------------------|

#### ILD diagnosis

##### Read code      Read term

|       |                               |
|-------|-------------------------------|
| H58y3 | Interstitial lung disease NEC |
| X102V | Interstitial lung disease     |

#### Lung function test

##### Read code      Read term

|       |                             |
|-------|-----------------------------|
| 3396  | Forced vital capacity - FVC |
| 339R. | FEV1/FVC percent            |
| 339S. | Percent predicted FEV1      |
| 339M. | FEV1/FVC ratio              |
| XaEFz | Percent predicted FEV1      |
| XaEFy | FEV1/FVC percent            |
| 339P. | Expected FEV1               |

|       |                                                   |
|-------|---------------------------------------------------|
| 339Q. | Expected FVC                                      |
| 339i. | FVC/Expected FVC percent                          |
| 3386  | Lung vital capacity                               |
| 339b. | FEV1 after bronchodilation                        |
| 3371  | Lung function testing done                        |
| 337.. | Lung function testing                             |
| 339a. | FEV1 before bronchodilation                       |
| XaCJK | Expected FEV1                                     |
| XaCJL | Expected FVC                                      |
| 339m. | FEV1/FVC ratio after bronchodilator               |
| 339h. | FVC after bronchodilation                         |
| XalxR | FEV1 after bronchodilation                        |
| 3373  | Lung function testing normal                      |
| XaJ9E | FEV1/FVC ratio after bronchodilator               |
| 339N. | Expected FEV1/FVC ratio                           |
| XaJ5w | FVC/Expected FVC percent                          |
| XaJ9D | FEV1/FVC ratio before bronchodilator              |
| XaJ3K | FVC after bronchodilation                         |
| 3377  | Lung function restrictive                         |
| 3399  | FEV1/FVC ratio abnormal                           |
| 339T. | FEV1/FVC > 70% of predicted                       |
| 339I. | FEV1/FVC ratio before bronchodilator              |
| XaF6d | FEV1/FVC < 70% of predicted                       |
| 3398  | FEV1/FVC ratio normal                             |
| 339E. | More than 80% of predicted peak flow rate         |
| 33960 | FVC - forced vital capacity normal                |
| 339F. | 60-80% of predicted peak flow rate                |
| 339U. | FEV1/FVC < 70% of predicted                       |
| XaCFR | Expected FEV1/FVC ratio                           |
| Xab2f | Percentage of predicted FVC after bronchodilation |
| XaF6e | FEV1/FVC > 70% of predicted                       |

### Smoking status

Read code

|       |                      |
|-------|----------------------|
| XE0oh | Never smoked tobacco |
|-------|----------------------|

### Sputum test

Read code

|       |                             |
|-------|-----------------------------|
| 4JF5. | Sputum sent for C/S         |
| X76IB | Clear sputum                |
| 4E2A. | Sputum appearance           |
| 4E11. | Sputum sent for examination |
| X76I5 | Volume of sputum            |

|       |                               |
|-------|-------------------------------|
| 4E3.. | Sputum microscopy             |
| XE0qp | Blood in sputum - haemoptysis |
| 4E... | Sputum examination            |
| 4E2E3 | Scanty sputum                 |
| 4E4.. | Sputum culture                |

### List of Read Codes for other baseline chronic respiratory diseases (excluding cancer)

#### Read code

---

|       |                                                             |
|-------|-------------------------------------------------------------|
| 23E5. | O/E - fibrosis of lung                                      |
| A114. | Tuberculous fibrosis of lung                                |
| A115. | Tuberculous bronchiectasis                                  |
| A1202 | Tuberculous hydrothorax                                     |
| A7899 | HIV disease resulting in lymphoid interstitial pneumonitis  |
| AD50. | Sarcoidosis of lung                                         |
| AD52. | Sarcoidosis of lung with sarcoidosis of lymph nodes         |
| AD54. | Sarcoidosis of inferior turbinates                          |
| C10N1 | Cystic fibrosis related diabetes mellitus                   |
| C370. | Cystic fibrosis                                             |
| C3700 | Cystic fibrosis with no meconium ileus                      |
| C3701 | Cystic fibrosis with meconium ileus                         |
| C3702 | Cystic fibrosis with pulmonary manifestations               |
| C3703 | Cystic fibrosis with intestinal manifestations              |
| C3704 | Arthropathy in cystic fibrosis                              |
| C3705 | Cystic fibrosis with distal intestinal obstruction syndrome |
| C3707 | Liver disease due to cystic fibrosis                        |
| C3708 | Cystic fibrosis related cirrhosis                           |
| C3709 | Exacerbation of cystic fibrosis                             |
| C370y | Cystic fibrosis with other manifestations                   |
| C370z | Cystic fibrosis NOS                                         |
| H34.. | Bronchiectasis                                              |
| H340. | Recurrent bronchiectasis                                    |
| H341. | Post-infective bronchiectasis                               |
| H34z. | Bronchiectasis NOS                                          |
| H35.. | Hypersensitivity pneumonitis                                |
| H350. | Farmers' lung                                               |
| H351. | Bagassosis                                                  |
| H352. | Bird-fancier's lung                                         |
| H3520 | Budgerigar-fanciers' lung                                   |
| H3521 | Pigeon-fanciers' lung                                       |
| H352z | Bird-fancier's lung NOS                                     |
| H353. | Suberosis ( cork-handlers' lung )                           |
| H354. | Malt workers' lung                                          |
| H355. | Mushroom workers' lung                                      |
| H356. | Maple bark strippers' lung                                  |
| H35y. | Other allergic alveolitis                                   |
| H35y0 | Cheese-washers' lung                                        |
| H35y1 | Coffee-workers' lung                                        |
| H35y2 | Fish-meal workers' lung                                     |
| H35y3 | Furriers' lung                                              |
| H35y4 | Grain-handlers' disease                                     |
| H35y5 | Pituitary snuff-takers' disease                             |
| H35y6 | Sequoiosis (red-cedar asthma)                               |

|       |                                                          |
|-------|----------------------------------------------------------|
| H35y7 | Wood asthma                                              |
| H35y8 | Air-conditioner and humidifier lung                      |
| H35yz | Other allergic alveolitis NOS                            |
| H35z0 | Allergic extrinsic alveolitis NOS                        |
| H35z1 | Hypersensitivity pneumonitis NOS                         |
| H4... | Lung disease due to external agents                      |
| H40.. | Coal workers' pneumoconiosis                             |
| H41.. | Asbestosis                                               |
| H410. | Pleural plaque disease due to asbestosis                 |
| H41z. | Asbestosis NOS                                           |
| H42.. | Silica and silicate pneumoconiosis                       |
| H420. | Talc pneumoconiosis                                      |
| H421. | Simple silicosis                                         |
| H422. | Complicated silicosis                                    |
| H423. | Massive silicotic fibrosis                               |
| H42z. | Silica pneumoconiosis NOS                                |
| H43.. | Pneumoconiosis due to other inorganic dust               |
| H430. | Aluminosis of lung                                       |
| H431. | Bauxite fibrosis of lung                                 |
| H432. | Berylliosis                                              |
| H433. | Graphite fibrosis of lung                                |
| H434. | Siderosis                                                |
| H435. | Stannosis                                                |
| H43z. | Pneumoconiosis due to inorganic dust NOS                 |
| H44.. | Pneumopathy due to inhalation of other dust              |
| H440. | Byssinosis                                               |
| H441. | Cannabinosis                                             |
| H442. | Flax-dressers' disease                                   |
| H44z. | Pneumopathy due to inhalation of other dust NOS          |
| H45.. | Pneumoconiosis NOS                                       |
| H450. | Pneumoconiosis associated with tuberculosis              |
| H46.. | Respiratory disease due to chemical fumes and vapours    |
| H462. | Upper respiratory inflammation due to chemical fumes     |
| H464. | Chronic respiratory conditions due to chemical fumes     |
| H4641 | Obliterative bronchiolitis due to chemical fumes         |
| H4642 | Chronic pulmonary fibrosis due to chemical fumes         |
| H464z | Chronic respiratory conditions due to chemical fumes NOS |
| H465. | Chemical-induced pulmonary oedema                        |
| H46z. | Respiratory conditions due to chemical fumes NOS         |
| H46z0 | Silo-fillers' disease                                    |
| H46zz | Respiratory conditions due to chemical fumes NOS         |
| H4710 | Lipoid pneumonia (exogenous)                             |
| H48.. | Progressive massive fibrosis                             |
| H4y.. | Other specified lung diseases due to external agent      |
| H4y1. | Chronic pulmonary radiation disease                      |
| H4y10 | Chronic pulmonary fibrosis following radiation           |
| H4y1z | Chronic pulmonary radiation disease NOS                  |
| H4y2. | Drug-induced interstitial lung disorders                 |
| H4y21 | Chronic drug-induced interstitial lung disorders         |
| H4yy. | Other external agent causing respiratory condition       |
| H4yz. | External agent causing respiratory conditions NOS        |
| H4z.. | Lung disease due to external agents NOS                  |
| H5000 | Empyema necessitans                                      |
| H5001 | Empyema with bronchopleural fistula                      |
| H5002 | Empyema with hepatopleural fistula                       |
| H5003 | Empyema with mediastinal fistula                         |

|       |                                                                |
|-------|----------------------------------------------------------------|
| H5004 | Empyema with pleural fistula NOS                               |
| H5005 | Empyema with thoracic fistula NOS                              |
| H5010 | Loculated empyema                                              |
| H5012 | Pleural empyema                                                |
| H5013 | Lung empyema NOS                                               |
| H5015 | Pyopneumothorax                                                |
| H510C | Pleural plaque                                                 |
| H51y. | Other pleural effusion excluding mention of tuberculosis       |
| H51y0 | Encysted pleurisy                                              |
| H51y7 | Malignant pleural effusion                                     |
| H51yz | Other pleural effusion                                         |
| H51z. | Pleural effusion NOS                                           |
| H54.. | Pulmonary congestion and hypostasis                            |
| H540. | Pulmonary hypostasis                                           |
| H540z | Pulmonary hypostasis NOS                                       |
| H5410 | Chronic pulmonary oedema                                       |
| H541z | Pulmonary oedema NOS                                           |
| H54z. | Pulmonary congestion and hypostasis NOS                        |
| H55.. | Postinflammatory pulmonary fibrosis                            |
| H56.. | Other alveolar and parietoalveolar disease                     |
| H560. | Pulmonary alveolar proteinosis                                 |
| H561. | Idiopathic pulmonary haemosiderosis                            |
| H562. | Pulmonary alveolar microlithiasis                              |
| H563. | Idiopathic pulmonary fibrosis                                  |
| H5630 | Alveolar capillary block                                       |
| H5631 | Diffuse pulmonary fibrosis                                     |
| H5632 | Pulmonary fibrosis                                             |
| H5633 | Usual interstitial pneumonitis                                 |
| H563z | Idiopathic fibrosing alveolitis NOS                            |
| H56yz | Other alveolar and parietoalveolar disease NOS                 |
| H56z. | Alveolar and parietoalveolar disease NOS                       |
| H57y0 | Pulmonary amyloidosis                                          |
| H57y2 | Pulmonary sarcoidosis                                          |
| H583. | Pulmonary eosinophilia                                         |
| H5830 | Loeffler's syndrome                                            |
| H5831 | Tropical eosinophilia                                          |
| H583z | Pulmonary eosinophilia NOS                                     |
| H5840 | Postoperative pulmonary oedema                                 |
| H5850 | Pulmonary insufficiency following shock                        |
| H5851 | Pulmonary insufficiency following surgery                      |
| H5852 | Pulmonary insufficiency following trauma                       |
| H585z | Trauma and postoperative pulmonary insufficiency NOS           |
| H58y0 | Broncholithiasis                                               |
| H58y3 | Interstitial lung disease NEC                                  |
| H58y5 | Respiratory bronchiolitis associated interstitial lung disease |
| H58y6 | Interstitial lung disease due to collagen vascular disease     |
| H58y7 | Interstitial lung disease due to connective tissue disease     |
| H5X.. | Pleural condition, unspecified                                 |
| H5y30 | Fibrosis of mediastinum                                        |
| Hy02. | Chronic pulmonary insufficiency following surgery              |
| Hyu4. | [X]Lung diseases due to external agents                        |
| Hyu40 | [X]Pneumoconiosis due to other dust containing silica          |
| Hyu41 | [X]Pneumoconiosis due to other specified inorganic dusts       |
| Hyu42 | [X]Airway disease due to other specific organic dusts          |
| Hyu43 | [X]Hypersensitivity pneumonitis due to other organic dusts     |

|       |                                                                                                        |
|-------|--------------------------------------------------------------------------------------------------------|
|       | [X]Upper respiratory inflammation due to chemicals, gases, fumes and vapours, not elsewhere classified |
| Hyu44 |                                                                                                        |
| Hyu46 | [X]Other respiratory conditions due to chemicals, gases, fumes and vapours                             |
| Hyu48 | [X]Chronic and other pulmonary manifestations due to radiation                                         |
| Hyu49 | [X]Respiratory conditions due to other specified external agents                                       |
| Hyu4A | [X]Respiratory conditions due to unspecified external agent                                            |
| Hyu5. | [X]Other respiratory diseases principally affecting the interstitium                                   |
| Hyu50 | [X]Other interstitial pulmonary diseases with fibrosis                                                 |
| Hyu51 | [X]Other specified interstitial pulmonary diseases                                                     |
| Hyu6. | [X]Suppurative and necrotic conditions of the lower respiratory tract                                  |
| Hyu70 | [X]Pleural effusion in conditions classified elsewhere                                                 |
| P861. | Congenital bronchiectasis                                                                              |
| PK35. | Kartageners syndrome                                                                                   |
| SP130 | Mendelson's syndrome as a complication of care                                                         |
| X00IU | Nasal sarcoidosis                                                                                      |
| X00nm | Laryngeal sarcoidosis                                                                                  |
| X100I | Congenital cystic bronchiectasis                                                                       |
| X100m | Acquired bronchiectasis                                                                                |
| X100n | Idiopathic bronchiectasis                                                                              |
| X100o | Obstructive bronchiectasis                                                                             |
| X100p | Toxin-induced bronchiectasis                                                                           |
| X100q | Bronchiectasis due to toxic aspiration                                                                 |
| X100r | Bronchiectasis due to toxic inhalation                                                                 |
| X100t | Post-lung transplantation bronchiectasis                                                               |
| X100V | Chronic pulmonary coccidioidomycosis                                                                   |
| X1012 | Benign asbestos pleural effusion                                                                       |
| X1013 | Drug-induced pleural effusion                                                                          |
| X1014 | Meigs syndrome                                                                                         |
| X101a | Primary ciliary dyskinesia due to transposition of ciliary microtubules                                |
| X101b | Immotile cilia syndrome due to defective radial spokes                                                 |
| X101c | Immotile cilia syndrome due to excessively long cilia                                                  |
| X101d | Young's syndrome                                                                                       |
| X101e | Rutland ciliary disorientation syndrome                                                                |
| X101T | Pleural plaque                                                                                         |
| X101U | Asbestos-induced pleural plaque                                                                        |
| X101Z | Polynesian bronchiectasis                                                                              |
| X102b | High altitude pulmonary oedema                                                                         |
| X102c | Post-upper airway obstruction pulmonary oedema                                                         |
| X102d | Toxic pulmonary oedema                                                                                 |
| X102e | Chemical-induced pulmonary oedema                                                                      |
| X102F | Allergic bronchopulmonary aspergillosis                                                                |
| X102g | Oxygen-induced pulmonary oedema                                                                        |
| X102H | Cryptogenic pulmonary eosinophilia                                                                     |
| X102h | Fluid overload pulmonary oedema                                                                        |
| X102I | Pulmonary histiocytosis X                                                                              |
| X102i | Uraemic pulmonary oedema                                                                               |
| X102J | Animal handlers' lung                                                                                  |
| X102K | Dog house disease                                                                                      |
| X102k | Seasonal cryptogenic organising pneumonia with biochemical cholestasis                                 |
| X102L | Dry rot lung                                                                                           |
| X102I | Diffuse infiltrative lung disease                                                                      |
| X102M | Lycoperdonosis                                                                                         |
| X102N | Wheat weevil disease                                                                                   |
| X102n | Idiopathic diffuse pulmonary ossification                                                              |
| X102O | New Guinea lung                                                                                        |
| X102o | Micronodular pulmonary ossification                                                                    |

|       |                                                      |
|-------|------------------------------------------------------|
| X102P | Paprika splitters' lung                              |
| X102p | Diffuse pulmonary neurofibromatosis                  |
| X102Q | Pyrethrum alveolitis                                 |
| X102q | Pulmonary tuberosc sclerosis                         |
| X102R | Rodent handlers' lung                                |
| X102S | Sewage workers' lung                                 |
| X102s | Pulmonary lipid storage disease                      |
| X102T | Summer-type hypersensitivity pneumonitis             |
| X102t | Bronchocentric granulomatosis                        |
| X102U | Vineyard sprayers' lung                              |
| X102u | Fibrosis of lung                                     |
| X102V | Interstitial lung disease                            |
| X102v | Usual interstitial pneumonitis                       |
| X102w | Desquamative interstitial pneumonitis                |
| X102x | Lymphoid interstitial pneumonitis                    |
| X102y | Giant cell interstitial pneumonitis                  |
| X102Z | Neurogenic pulmonary oedema                          |
| X1030 | Toxic diffuse interstitial pulmonary fibrosis        |
| X1031 | Drug-induced diffuse interstitial pulmonary fibrosis |
| X1032 | Localised pulmonary fibrosis                         |
| X1033 | Mediastinal radiation fibrosis                       |
| X103a | Erionite pneumoconiosis                              |
| X103b | Kaolin pneumoconiosis                                |
| X103c | Metal pneumoconiosis                                 |
| X103d | Antimony pneumoconiosis                              |
| X103e | Argyro-siderosis                                     |
| X103f | Barium pneumoconiosis                                |
| X103G | Radiation-induced fibrous mediastinitis              |
| X103i | Chronic berylliosis                                  |
| X103j | Cerium pneumoconiosis                                |
| X103k | Hard metal pneumoconiosis                            |
| X103l | Nickel pneumoconiosis                                |
| X103m | Thorium pneumoconiosis                               |
| X103N | Mediastinal lymph node sarcoidosis                   |
| X103n | Zirconium pneumoconiosis                             |
| X103o | Mica pneumoconiosis                                  |
| X103p | Mixed mineral dust pneumoconiosis                    |
| X103q | Liparosis                                            |
| X103r | Slate pneumoconiosis                                 |
| X103s | Diatomite pneumoconiosis                             |
| X103v | Chronic silicosis                                    |
| X103W | Simple pneumoconiosis                                |
| X103w | Silicotuberculosis                                   |
| X103X | Complicated pneumoconiosis                           |
| X103x | Wollastonite pneumoconiosis                          |
| X103Y | Rheumatoid pneumoconiosis                            |
| X103Z | Bentonite pneumoconiosis                             |
| X1043 | Stage 1 pulmonary sarcoidosis                        |
| X1044 | Stage 2 pulmonary sarcoidosis                        |
| X1045 | Stage 3 pulmonary sarcoidosis                        |
| X1046 | Stage 4 pulmonary sarcoidosis                        |
| X1047 | Endobronchial sarcoidosis                            |
| X1048 | Necrotising sarcoid granulomatosis                   |
| X1049 | Sarcoid pulmonary calcification                      |
| X20GM | Nasopharyngeal sarcoidosis                           |
| X309R | Cystic fibrosis of pancreas                          |



|       |                                                                |
|-------|----------------------------------------------------------------|
| X70Qb | Chronic necrotising pulmonary aspergillosis                    |
| X70Ra | Chronic pulmonary African histoplasmosis                       |
| X70Rg | Chronic pulmonary blastomycosis                                |
| Xa08A | Chronic pulmonary insufficiency of prematurity                 |
| Xa0IL | Malignant pleural effusion                                     |
| Xa0kb | Tropical pulmonary eosinophilia                                |
| Xa0lb | Pleural effusion                                               |
| Xa0Xi | Pulmonary lymphangioleiomyomatosis                             |
| Xa6YO | Pulmonary oedema                                               |
| Xa9Bw | Pneumoconiosis                                                 |
| Xa9By | Diffuse pulmonary calcinosis                                   |
| Xaa7C | Eosinophilic bronchitis                                        |
| XaB1L | Haemorrhagic pleural effusion                                  |
| XaBDb | Cystic fibrosis with other manifestations                      |
| XaCL7 | Sarcoidosis of inferior turbinates                             |
| XaJIX | [X]Hepatopulmonary syndrome                                    |
| XaMzI | Cystic fibrosis related diabetes mellitus                      |
| XaREa | Liver disease due to cystic fibrosis                           |
| XaREX | Arthropathy in cystic fibrosis                                 |
| XaREZ | Cystic fibrosis with distal intestinal obstruction syndrome    |
| XaXIE | Respiratory bronchiolitis associated interstitial lung disease |
| XaXIF | Interstitial lung disease due to collagen vascular disease     |
| XaXIJ | Interstitial lung disease due to connective tissue disease     |
| XaZr7 | Exacerbation of cystic fibrosis                                |
| XE0Ya | Post-inflammatory pulmonary fibrosis                           |
| XE0Yb | Cryptogenic fibrosing alveolitis                               |
| XE0Yd | Trauma and postoperative pulmonary insufficiency               |
| XE0Ye | Adult respiratory distress syndrome                            |
| XE0YY | Lung disease due to external agents                            |
| XE0Zn | Lung: [pulmonary oedema NOS] or [congestion]                   |
| XE0Zr | Idiopath. fibrosing alveolitis (& Hamman-Rich syndrome)        |
| XE0ZZ | (Pneumoconiosis NOS) or (siderosis)                            |
| XE2wL | Tuberculous pleural empyema                                    |
| XE2wM | Pleural empyema                                                |
| XE2wN | Pleural empyema with fistula                                   |
| XE2wP | Pleural empyema with no fistula                                |
| XE2wR | Pleural empyema NOS                                            |

## RESULTS

Supplementary Table E1. Baseline demographic patient characteristics and procedures conducted within the overall IPF patients (n=1,116).

| Variable*                                                                                                                      | Overall IPF patients                                               |
|--------------------------------------------------------------------------------------------------------------------------------|--------------------------------------------------------------------|
| Age (years),<br>• mean (SD)<br>• median (IQR)                                                                                  | 74.8 (10.0)<br>76.0 (69.0; 82.0)                                   |
| Male gender                                                                                                                    | 706 (60.5)                                                         |
| BMI<br>• % non-missing<br>• <18.5<br>• 18.5 - <25<br>• 25 - <30<br>• ≥30                                                       | 1,112 (95.4)<br>23 (2.1)<br>343 (30.9)<br>443 (39.8)<br>303 (27.2) |
| Smoking status<br>• n (% non-missing)<br>• Current smoker<br>• Ex-smoker<br>• Never smoked                                     | 1,119 (96.0)<br>110 (9.8)<br>604 (54.0)<br>405 (36.2)              |
| Asthma diagnosis <sup>†</sup>                                                                                                  | 53 (4.5)                                                           |
| COPD diagnosis <sup>†</sup>                                                                                                    | 35 (3.0)                                                           |
| Respiratory tract cancer                                                                                                       | 1 (0.1)                                                            |
| Other chronic respiratory diseases (excl. cancer)                                                                              | 26 (2.2)                                                           |
| Lung function test conducted<br>• 90 days prior diagnosis<br>• 365 days prior diagnosis                                        | 198 (17.0)<br>355 (30.4)                                           |
| *Numbers are presented as n (%) unless specified. <sup>†</sup> First diagnostic code recorded ever prior and up to index date. |                                                                    |

Supplementary Table E2. Presence of signs & symptoms in the year prior to IPF diagnosis, identified via Read Codes only or with the addition of free-text, in both overall IPF patients and patients with chest specialist consultation followed by IPF diagnosis.

| Signs and symptom*                                                                                                                                                                          | All patients with IPF (N=1,166) |                         | Consultation followed by diagnosis (N=462) |                          |
|---------------------------------------------------------------------------------------------------------------------------------------------------------------------------------------------|---------------------------------|-------------------------|--------------------------------------------|--------------------------|
|                                                                                                                                                                                             | Read Codes and Free-text        | Read Codes only         | Read Codes and Free-text                   | Read Codes only          |
| Dyspnoea                                                                                                                                                                                    | 483 (41.4)                      | 361 (31.0)              | 225 (48.7)                                 | 162 (35.1)               |
| Cough                                                                                                                                                                                       | 457 (39.2) <sup>†</sup>         | 371 (31.8) <sup>‡</sup> | 189 (40.9) <sup>§</sup>                    | 149 (32.3) <sup>  </sup> |
| Fatigue or malaise                                                                                                                                                                          | 65 (5.6)                        | 39 (3.3)                | 22 (4.8)                                   | 13 (2.8)                 |
| Weight loss                                                                                                                                                                                 | 45 (3.9)                        | 30 (2.6)                | 19 (4.1)                                   | 16 (3.5)                 |
| Crackles                                                                                                                                                                                    | 28 (2.4)                        | 1 (0.1)                 | 14 (3.0)                                   | 0 (0.0)                  |
| Loss of appetite                                                                                                                                                                            | 25 (2.1)                        | 14 (1.2)                | 13 (2.8)                                   | 7 (1.5)                  |
| Clubbed fingers                                                                                                                                                                             | 5 (0.4)                         | 4 (0.3)                 | 2 (0.4)                                    | 1 (0.2)                  |
| *Numbers are presented as n (%) unless specified. <sup>†</sup> , <sup>‡</sup> , <sup>§</sup> , <sup>  </sup> Include 54 (4.6%), 40 (3.4%), 25 (5.4%), and 18 (3.9%) dry cough respectively. |                                 |                         |                                            |                          |

Supplementary Table E3. Prevalence (n[%]) of each component of respiratory consultation and respiratory test before chest specialist consultation prior to IPF diagnosis (n=462).

| <b>Variable</b>                            | <b>90 days</b>    | <b>365 days</b>   |
|--------------------------------------------|-------------------|-------------------|
| <b>Respiratory consultations (overall)</b> | <b>238 (51.5)</b> | <b>360 (77.9)</b> |
| Clubbed fingers                            | 1 (0.2)           | 2 (0.4)           |
| Cough                                      | 108 (23.4)        | 196 (42.4)        |
| Crackles                                   | 7 (1.5)           | 13 (2.8)          |
| Dyspnoea                                   | 142 (30.7)        | 226 (48.9)        |
| Sputum                                     | 9 (1.9)           | 13 (2.8)          |
| Chest symptom                              | 33 (7.1)          | 52 (11.3)         |
| Chest/respiratory infection                | 73 (15.8)         | 130 (28.1)        |
|                                            |                   |                   |
| <b>Respiratory tests (overall)</b>         | <b>176 (38.1)</b> | <b>283 (61.3)</b> |
| Chest X-ray                                | 102 (22.1)        | 191 (41.3)        |
| Chest CT-Scan                              | 7 (1.5)           | 8 (1.7)           |
| Lung function test                         | 89 (19.3)         | 150 (32.5)        |
| Chest examination                          | 12 (2.6)          | 22 (4.8)          |

Supplementary Table E4. History of respiratory consultation and respiratory test in period before diagnosis or chest specialist consultation in all patients with IPF diagnosis or medication (n=1,166)\*

| Variable                                                                                                                                                                                                                                                         | Frequency, n (%) |
|------------------------------------------------------------------------------------------------------------------------------------------------------------------------------------------------------------------------------------------------------------------|------------------|
| Respiratory consultation <sup>†</sup>                                                                                                                                                                                                                            |                  |
| • within 90 days prior diagnosis or consultation                                                                                                                                                                                                                 | 543 (46.6)       |
| • within 365 days prior diagnosis or consultation                                                                                                                                                                                                                | 850 (72.9)       |
| Respiratory tests conducted <sup>‡</sup>                                                                                                                                                                                                                         |                  |
| • within 90 days prior diagnosis or consultation                                                                                                                                                                                                                 | 395 (33.9)       |
| • within 365 days prior diagnosis or consultation                                                                                                                                                                                                                | 636 (54.5)       |
| *Frequency expressed as n (%). <sup>†</sup> Codes for chest/respiratory infection, chest symptoms, clubbed fingers, cough, crackles, dyspnoea, or sputum or wheeze. <sup>‡</sup> Codes for chest X-ray, chest CT scan, lung function test and chest examination. |                  |

Supplementary Table E5. Co-occurrence of signs and symptoms in the one-year period up to IPF diagnosis – All IPF patients (n=1,166)

| Clubbed fingers | Cough | Crackles | Dry cough | Dyspnoea | Fatigue or malaise | Loss of appetite | Weight loss | Patients | %    | Cumulative % |
|-----------------|-------|----------|-----------|----------|--------------------|------------------|-------------|----------|------|--------------|
|                 |       |          |           |          |                    |                  |             | 412      | 35.3 | 35.3         |
|                 |       |          |           |          |                    |                  |             | 225      | 19.3 | 54.6         |
|                 |       |          |           |          |                    |                  |             | 177      | 15.2 | 69.8         |
|                 |       |          |           |          |                    |                  |             | 162      | 13.9 | 83.7         |
|                 |       |          |           |          |                    |                  |             | 23       | 2.0  | 85.7         |
|                 |       |          |           |          |                    |                  |             | 23       | 2.0  | 87.7         |
|                 |       |          |           |          |                    |                  |             | 18       | 1.5  | 89.2         |
|                 |       |          |           |          |                    |                  |             | 17       | 1.5  | 90.7         |
|                 |       |          |           |          |                    |                  |             | 13       | 1.1  | 91.8         |
|                 |       |          |           |          |                    |                  |             | 10       | 0.9  | 92.6         |
|                 |       |          |           |          |                    |                  |             | 8        | 0.7  | 93.3         |
|                 |       |          |           |          |                    |                  |             | 8        | 0.7  | 94.0         |
|                 |       |          |           |          |                    |                  |             | 8        | 0.7  | 94.7         |
|                 |       |          |           |          |                    |                  |             | 7        | 0.6  | 95.3         |
|                 |       |          |           |          |                    |                  |             | 4        | 0.3  | 95.6         |
|                 |       |          |           |          |                    |                  |             | 4        | 0.3  | 96.0         |
|                 |       |          |           |          |                    |                  |             | 4        | 0.3  | 96.3         |
|                 |       |          |           |          |                    |                  |             | 3        | 0.3  | 96.6         |
|                 |       |          |           |          |                    |                  |             | 3        | 0.3  | 96.8         |
|                 |       |          |           |          |                    |                  |             | 3        | 0.3  | 97.1         |
|                 |       |          |           |          |                    |                  |             | 3        | 0.3  | 97.3         |
|                 |       |          |           |          |                    |                  |             | 2        | 0.2  | 97.5         |
|                 |       |          |           |          |                    |                  |             | 2        | 0.2  | 97.7         |
|                 |       |          |           |          |                    |                  |             | 2        | 0.2  | 97.9         |
|                 |       |          |           |          |                    |                  |             | 2        | 0.2  | 98.0         |
|                 |       |          |           |          |                    |                  |             | 2        | 0.2  | 98.2         |
|                 |       |          |           |          |                    |                  |             | 2        | 0.2  | 98.4         |
|                 |       |          |           |          |                    |                  |             | 2        | 0.2  | 98.5         |
|                 |       |          |           |          |                    |                  |             | 1        | 0.1  | 98.6         |
|                 |       |          |           |          |                    |                  |             | 1        | 0.1  | 98.7         |
|                 |       |          |           |          |                    |                  |             | 1        | 0.1  | 98.8         |
|                 |       |          |           |          |                    |                  |             | 1        | 0.1  | 98.9         |
|                 |       |          |           |          |                    |                  |             | 1        | 0.1  | 99.0         |
|                 |       |          |           |          |                    |                  |             | 1        | 0.1  | 99.1         |
|                 |       |          |           |          |                    |                  |             | 1        | 0.1  | 99.1         |
|                 |       |          |           |          |                    |                  |             | 1        | 0.1  | 99.2         |
|                 |       |          |           |          |                    |                  |             | 1        | 0.1  | 99.3         |
|                 |       |          |           |          |                    |                  |             | 1        | 0.1  | 99.4         |
|                 |       |          |           |          |                    |                  |             | 1        | 0.1  | 99.5         |
|                 |       |          |           |          |                    |                  |             | 1        | 0.1  | 99.6         |
|                 |       |          |           |          |                    |                  |             | 1        | 0.1  | 99.7         |
|                 |       |          |           |          |                    |                  |             | 1        | 0.1  | 99.7         |
|                 |       |          |           |          |                    |                  |             | 1        | 0.1  | 99.8         |
|                 |       |          |           |          |                    |                  |             | 1        | 0.1  | 99.9         |
|                 |       |          |           |          |                    |                  |             | 1        | 0.1  | 100.0        |

Supplementary Table E6. Number of patients with at least a certain average symptom frequency (recording dates/year) in the period of up to 12 years before IPF diagnosis.

| Symptom frequency<br>(recording dates/year) | N (%)    |            |            |            |
|---------------------------------------------|----------|------------|------------|------------|
|                                             | ≥1       | ≥0.5       | ≥0.33      | ≥0.25      |
| Cough                                       | 43 (9.3) | 118 (25.6) | 168 (36.4) | 198 (43.0) |
| Dyspnoea                                    | 35 (7.6) | 83 (18.0)  | 130 (28.2) | 157 (34.1) |
| Fatigue/malaise                             | 5 (1.1)  | 9 (2.0)    | 22 (4.8)   | 36 (7.8)   |
| Weight loss recorded                        | 2 (0.4)  | 4 (0.9)    | 9 (2.0)    | 13 (2.8)   |
| Chest infection                             | 1 (0.2)  | 5 (1.1)    | 7 (1.5)    | 11 (2.4)   |
| Dry cough                                   | 0 (0.0)  | 3 (0.7)    | 7 (1.5)    | 10 (2.2)   |
| Lung function test                          | 2 (0.4)  | 2 (0.4)    | 6 (1.3)    | 9 (2.0)    |
| Chest exam                                  | 1 (0.2)  | 1 (0.2)    | 2 (0.4)    | 4 (0.9)    |
| Crackles                                    | 0 (0.0)  | 1 (0.2)    | 2 (0.4)    | 3 (0.7)    |
| Loss of appetite                            | 0 (0.0)  | 0 (0.0)    | 0 (0.0)    | 3 (0.7)    |
| Specialist referral                         | 1 (0.2)  | 1 (0.2)    | 3 (0.7)    | 3 (0.7)    |
| Chest X-ray                                 | 2 (0.4)  | 2 (0.4)    | 2 (0.4)    | 2 (0.4)    |
| Chest symptoms                              | 0 (0.0)  | 1 (0.2)    | 1 (0.2)    | 2 (0.4)    |
| Sputum                                      | 0 (0.0)  | 0 (0.0)    | 1 (0.2)    | 1 (0.2)    |

Supplementary Table E7. Life table for cumulative probability of IPF diagnosis since the first symptom of cough or dyspnoea.

| Year | Time since first cough |           |                        | Time since first dyspnoea |           |                        |
|------|------------------------|-----------|------------------------|---------------------------|-----------|------------------------|
|      | At risk                | Diagnosed | Cumulative probability | At risk                   | Diagnosed | Cumulative probability |
| 1    | 322                    | 56        | 0.17 (0.14-0.22)       | 293                       | 86        | 0.29 (0.24-0.35)       |
| 2    | 266                    | 30        | 0.27 (0.22-0.32)       | 207                       | 35        | 0.41 (0.36-0.47)       |
| 3    | 236                    | 20        | 0.33 (0.28-0.38)       | 172                       | 23        | 0.49 (0.44-0.55)       |
| 4    | 216                    | 27        | 0.41 (0.36-0.47)       | 149                       | 26        | 0.58 (0.52-0.64)       |
| 5    | 189                    | 28        | 0.50 (0.45-0.56)       | 123                       | 18        | 0.64 (0.59-0.70)       |
| 6    | 161                    | 20        | 0.56 (0.51-0.62)       | 105                       | 14        | 0.69 (0.64-0.74)       |
| 7    | 141                    | 27        | 0.65 (0.59-0.70)       | 91                        | 16        | 0.74 (0.69-0.79)       |
| 8    | 114                    | 14        | 0.69 (0.64-0.74)       | 75                        | 13        | 0.79 (0.74-0.83)       |
| 9    | 100                    | 19        | 0.75 (0.70-0.79)       | 62                        | 14        | 0.84 (0.79-0.88)       |
| 10   | 81                     | 15        | 0.80 (0.75-0.84)       | 48                        | 19        | 0.90 (0.86-0.93)       |
| 11   | 66                     | 12        | 0.83 (0.79-0.87)       | 29                        | 6         | 0.92 (0.89-0.95)       |
| 12   | 54                     | 8         | 0.86 (0.82-0.89)       | 23                        | 4         | 0.94 (0.90-0.96)       |
| 13   | 46                     | 10        | 0.89 (0.85-0.92)       | 19                        | 7         | 0.96 (0.93-0.98)       |
| 14   | 36                     | 6         | 0.91 (0.87-0.94)       | 12                        | 5         | 0.98 (0.95-0.99)       |
| 15   | 30                     | 4         | 0.92 (0.89-0.95)       | 12                        | 0         | 0.98 (0.95-0.99)       |
| 16   | 26                     | 3         | 0.93 (0.90-0.95)       | 12                        | 0         | 0.98 (0.95-0.99)       |
| 17   | 23                     | 3         | 0.94 (0.91-0.96)       | 7                         | 2         | 0.98 (0.96-0.99)       |
| 18   | 20                     | 3         | 0.95 (0.92-0.97)       | 5                         | 2         | 0.99 (0.97-1.00)       |
| 19   | 17                     | 4         | 0.96 (0.93-0.98)       | 5                         | 0         | 0.99 (0.97-1.00)       |
| 20   | 13                     | 5         | 0.98 (0.95-0.99)       | 3                         | 1         | 0.99 (0.98-1.00)       |
| 21   | 8                      | 1         | 0.98 (0.96-0.99)       | 2                         | 2         | 1.00 (1.00-1.00)       |
| 22   | 7                      | 2         | 0.98 (0.97-0.99)       |                           |           |                        |
| 23   | 5                      | 1         | 0.99 (0.97-1.00)       |                           |           |                        |
| 24   | 4                      | 1         | 0.99 (0.97-1.00)       |                           |           |                        |
| 25   | 3                      | 2         | 1.00 (0.98-1.00)       |                           |           |                        |
| 30   | 1                      | 1         | 1.00 (1.00-1.00)       |                           |           |                        |



Supplementary Figure E1. Principal component analysis (PCA) based network chart for the association between signs & symptoms Read Code within 90 and within 365 days prior IPF diagnosis in overall IPF patients (n=1,116). Bubble size indicates prevalence, and thickness of lines indicate the degree of association between signs & symptoms.

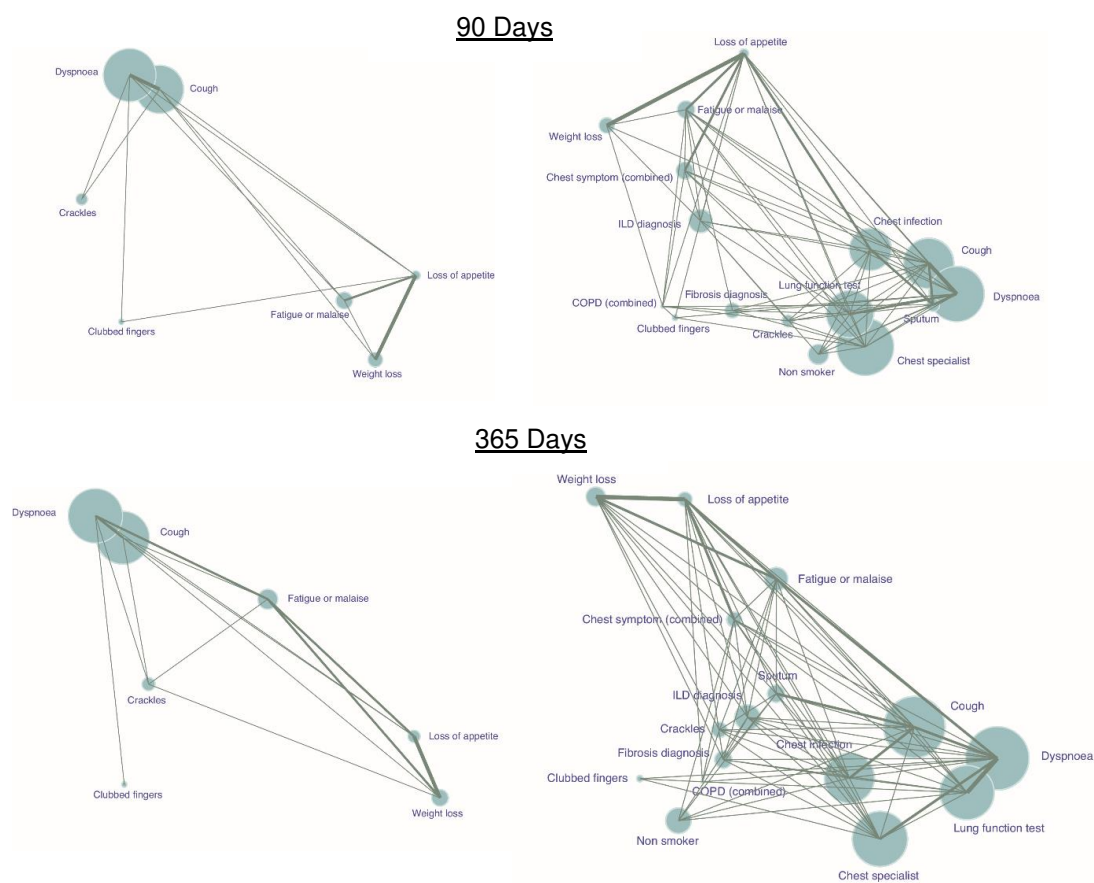

Supplementary Figure E2. Frequency of codes for signs and symptoms from 7 years prior IPF diagnosis or medication – Overall IPF patients (n=1,116). A: All symptoms, B: Dyspnoea and Cough, C: Infrequent symptoms

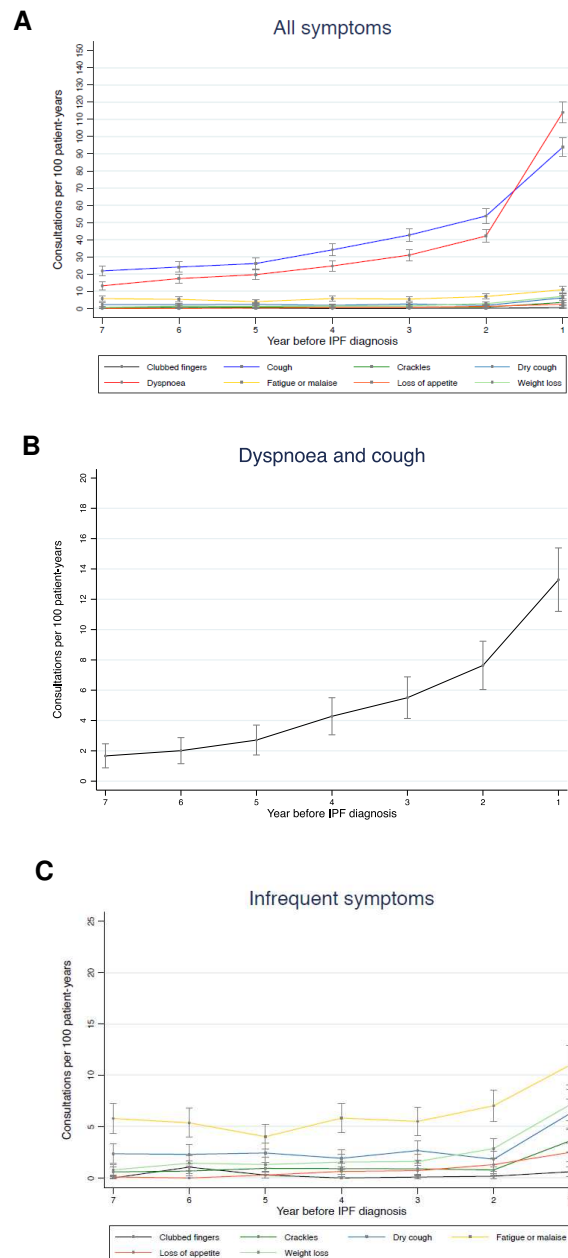

Supplementary Figure E3. Time course of respiratory symptoms and weight prior to the diagnosis of IPF showing rapid weight loss and early diagnosis.

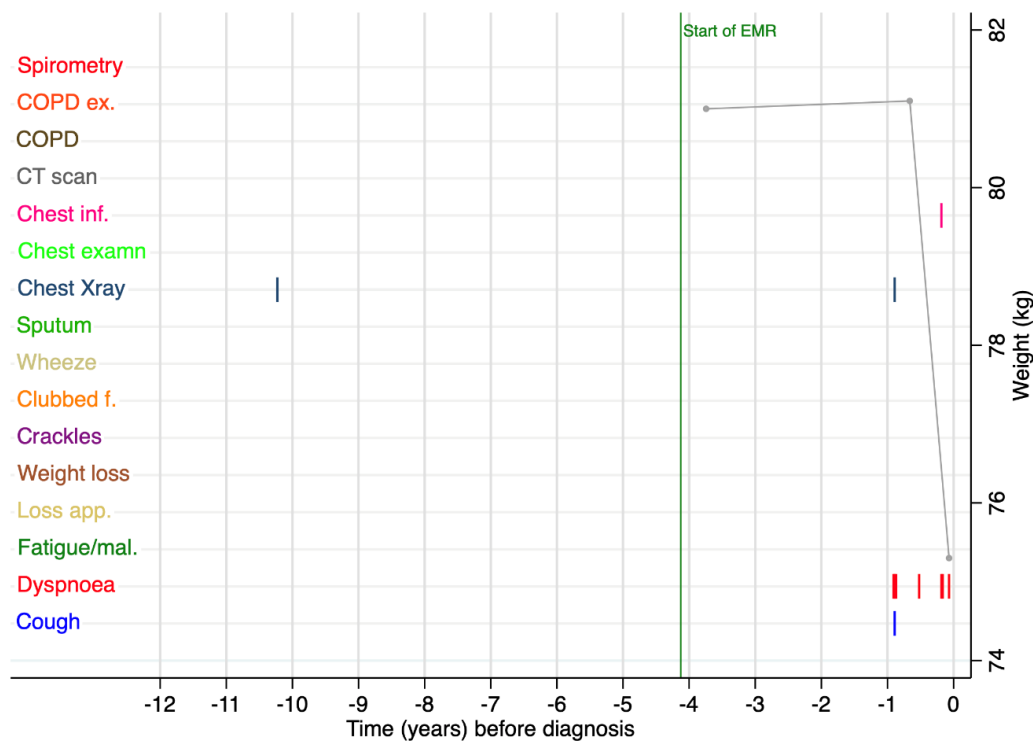

Supplementary Figure E4. Other time course of respiratory symptoms and weight patterns prior to diagnosis of IPF

Late symptoms onset, mainly dyspnoea with catastrophic weight loss

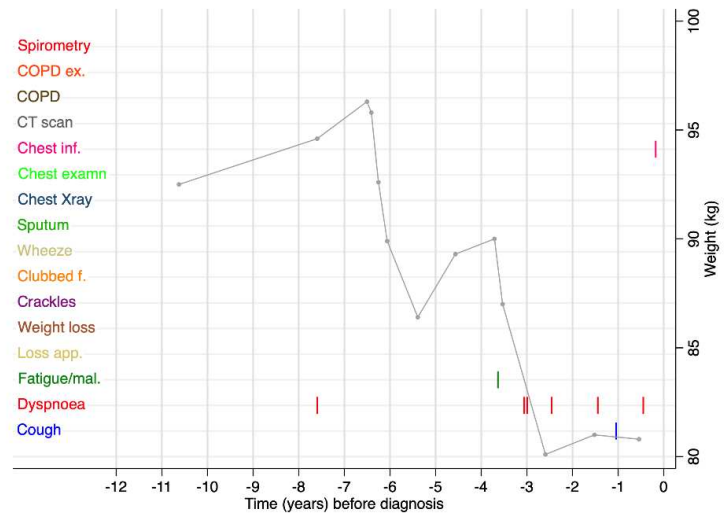

Long period of symptoms

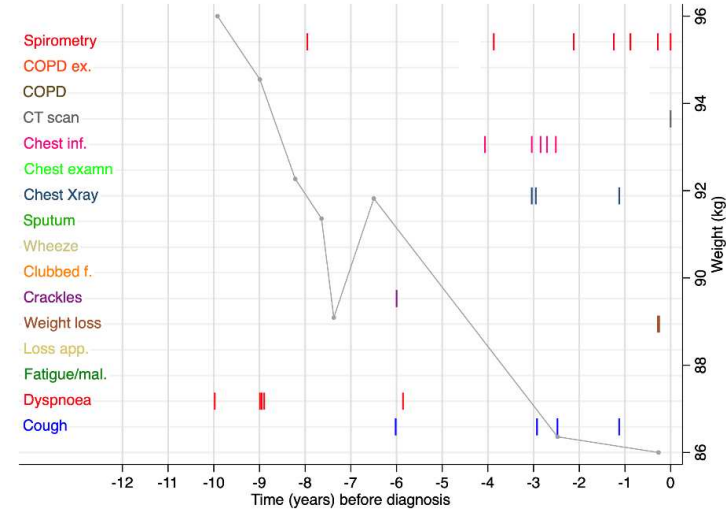

Weight loss as presenting symptom

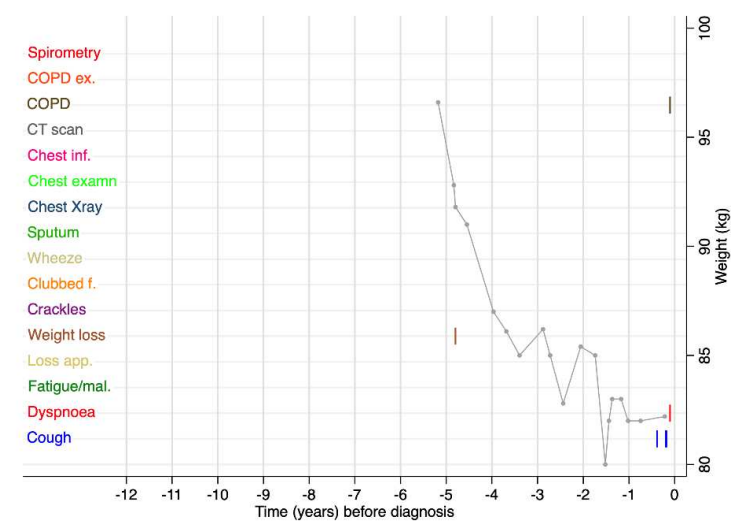

No obvious weight loss: dyspnoea as presenting symptom

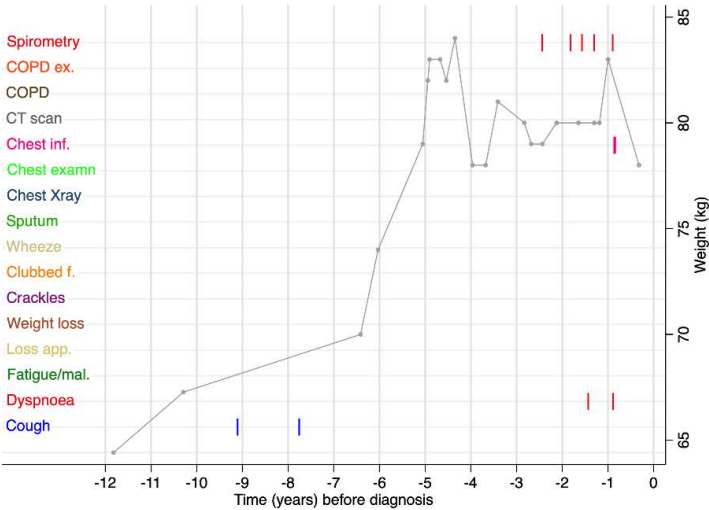

Long period of cough and dyspnoea

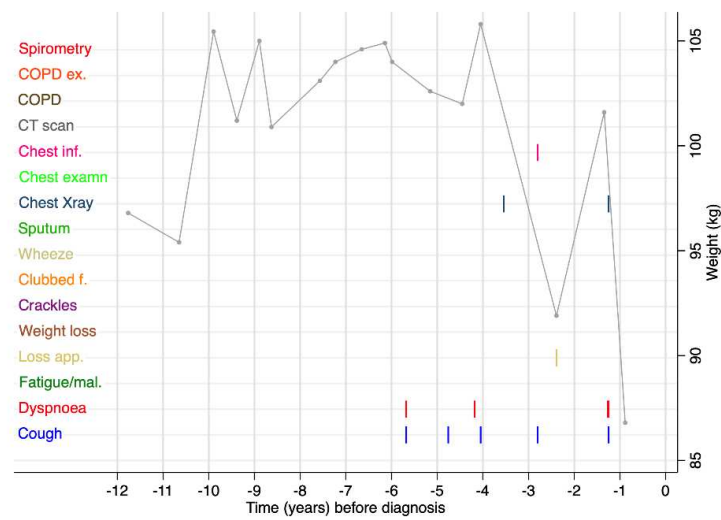

3 years of symptoms without weight loss

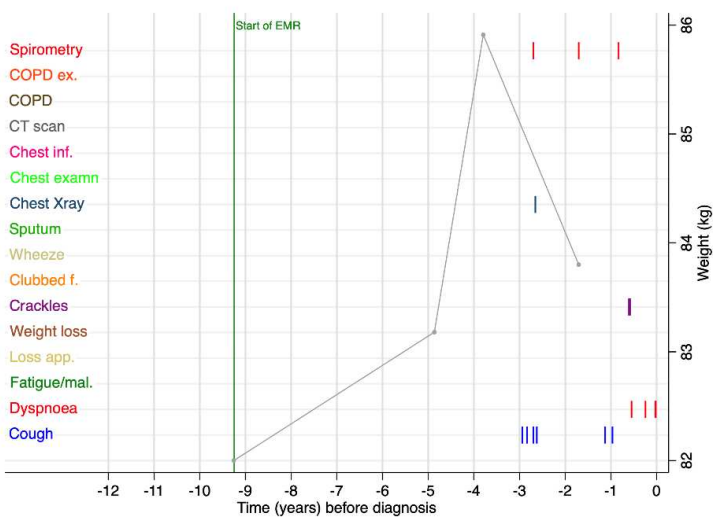

4 years of symptoms; late weight loss; likely treated as COPD

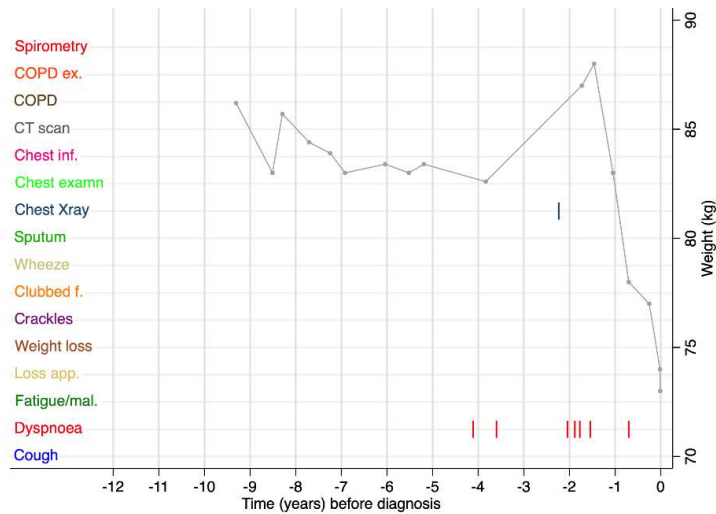

Likely treated as COPD for 10 years with ICS/LABA

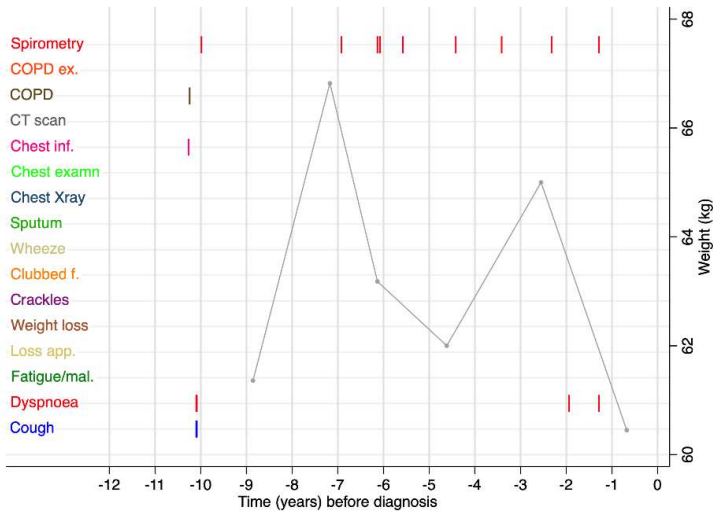

Rapid diagnosis

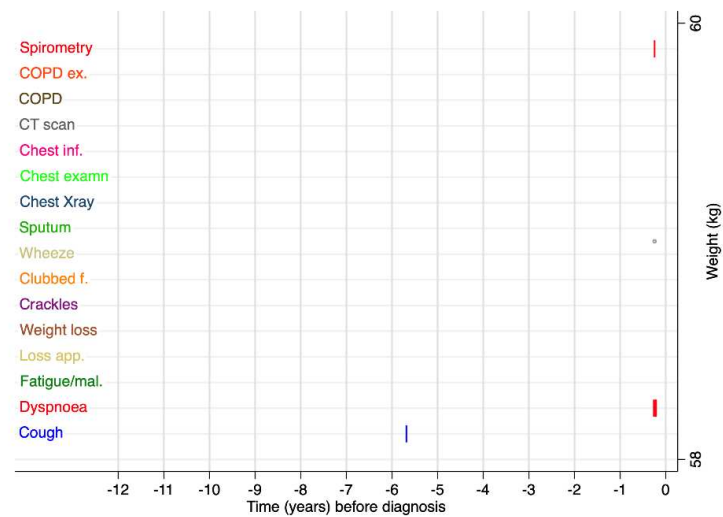

4 years of weight loss before diagnosis; Previously diagnosed with COPD

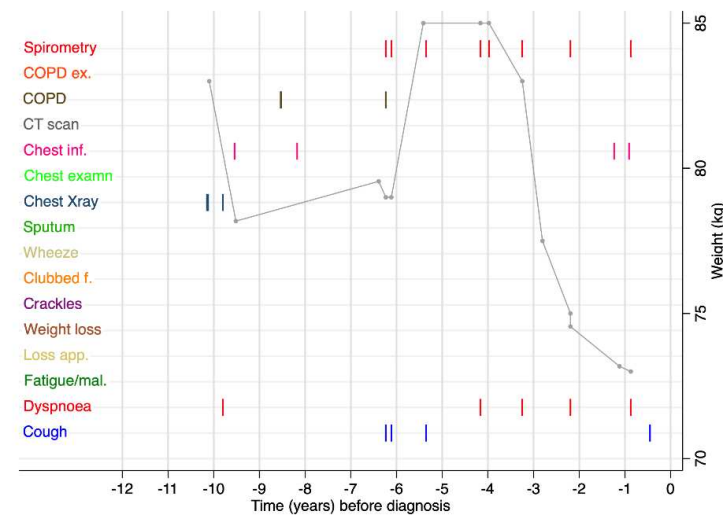



Long, slow weight decline; late diagnosis

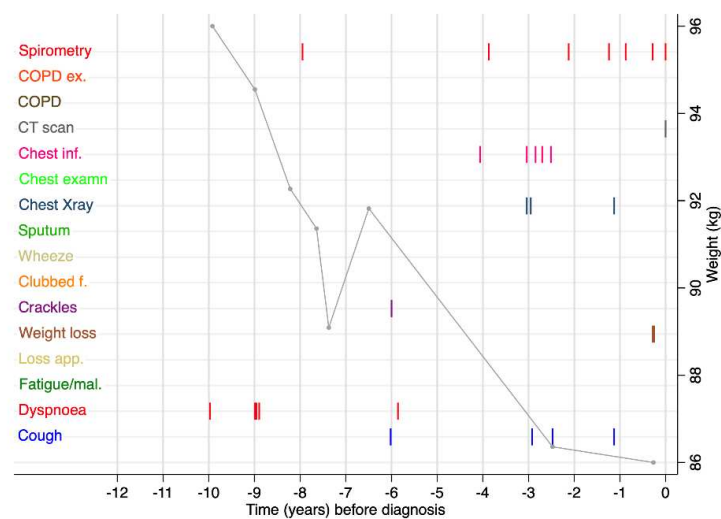

Early diagnosis; no respiratory symptom recorded; investigated for weight loss

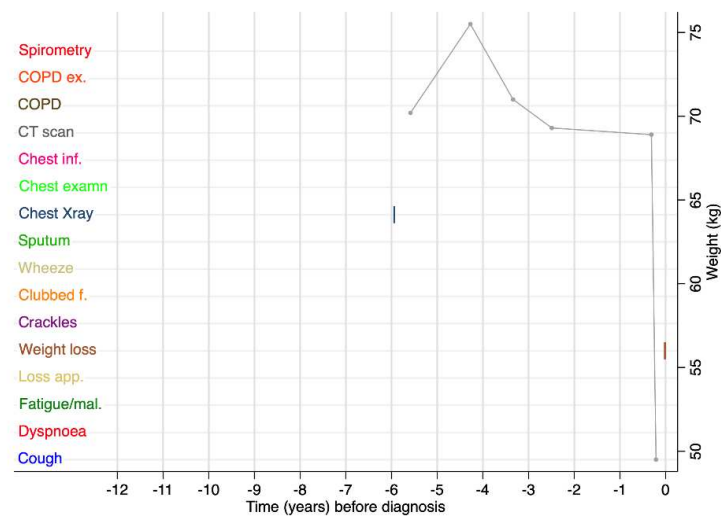

Supplementary Figure E5. Kaplan-Meier plot for cumulative probability of IPF diagnosis over time since first symptom of cough or dyspnoea.

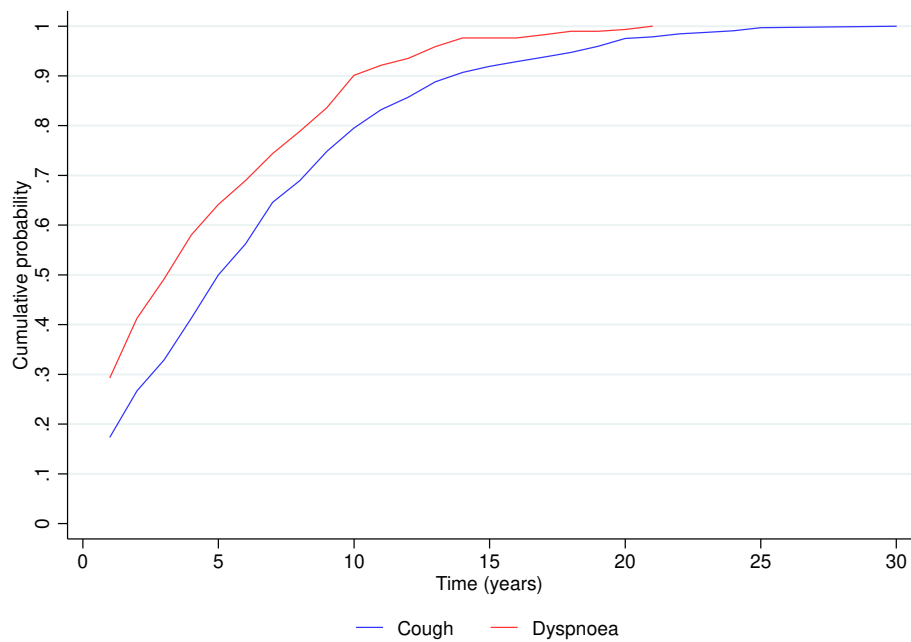

Supplement: inline-supplementary-material-1 [file inline-supplementary-material-1.pdf]
